# Supplementary material for: Caspase-3 suppresses diethylnitrosamine-induced hepatocyte death, compensatory proliferation and hepatocarcinogenesis through inhibiting p38 activation
Source: PubMed Central journal article supplement (PMC5948202; doi:10.1038/s41419-018-0617-7), 2018-05-11

Fig. S1

A

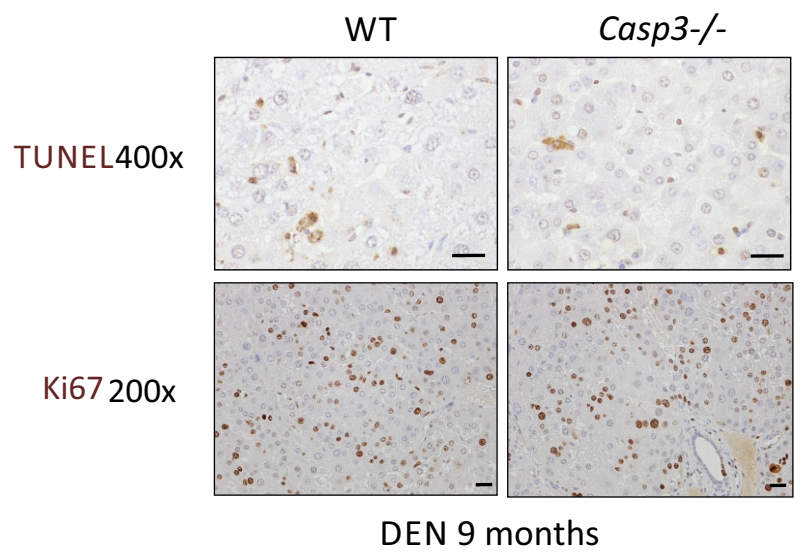

B

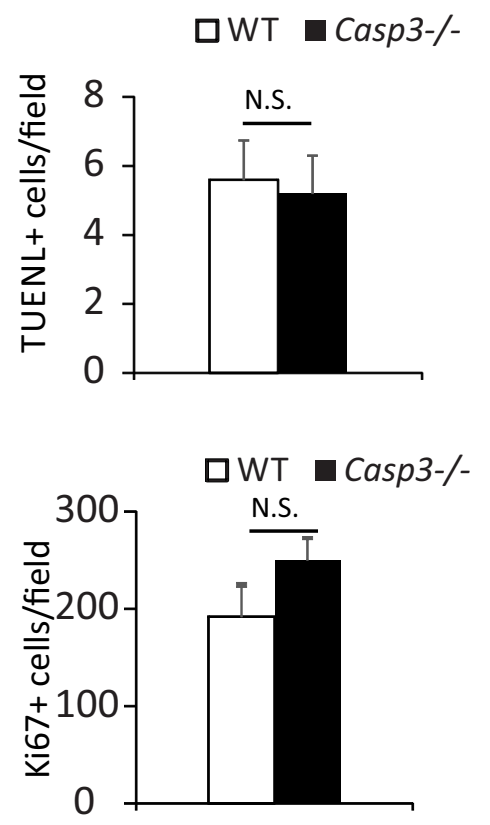

Fig. S2

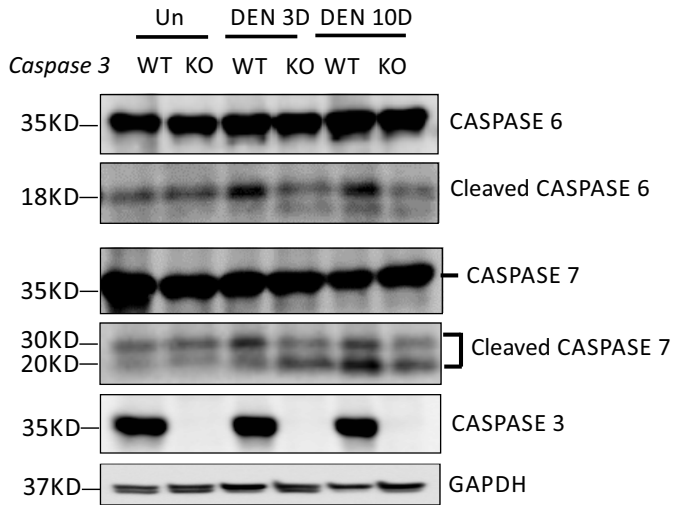

Fig. S3

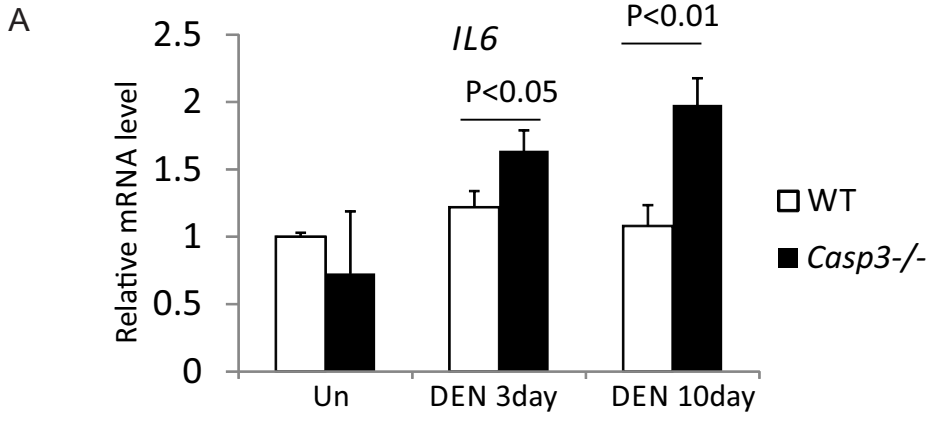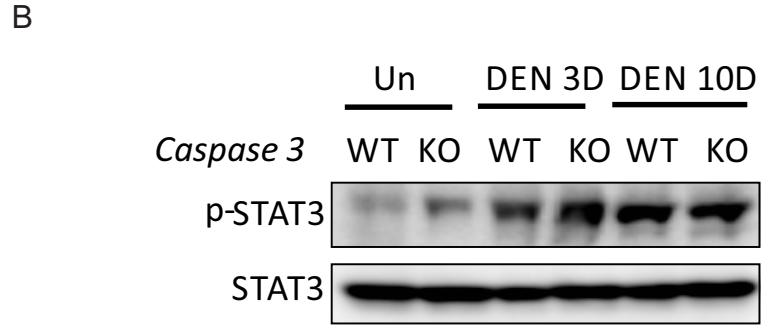

Fig. S4

A

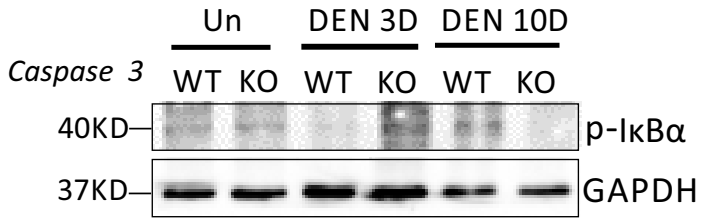

B

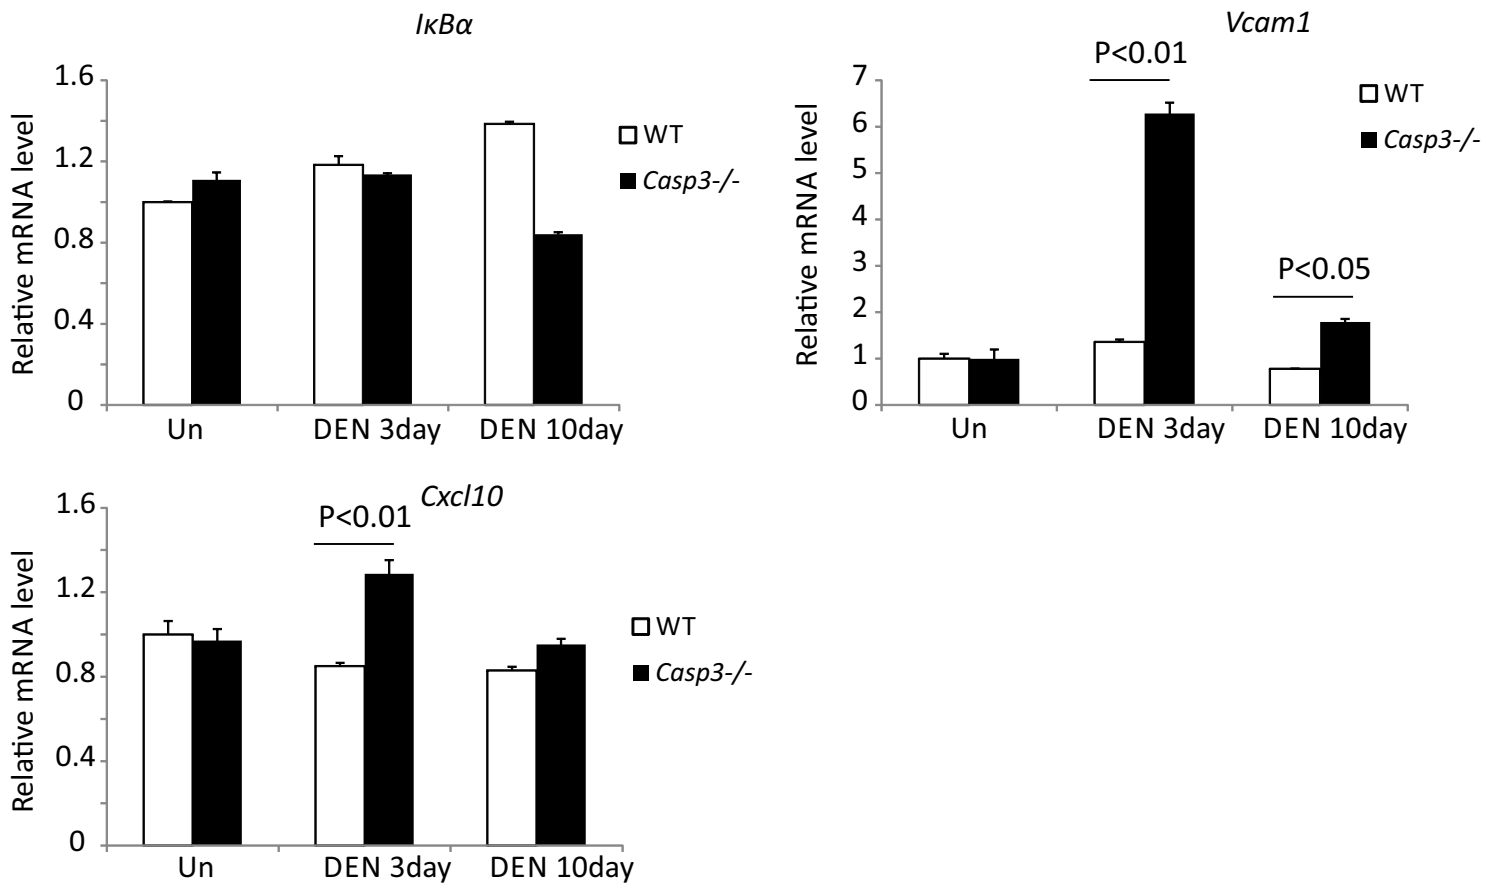

Fig. S5

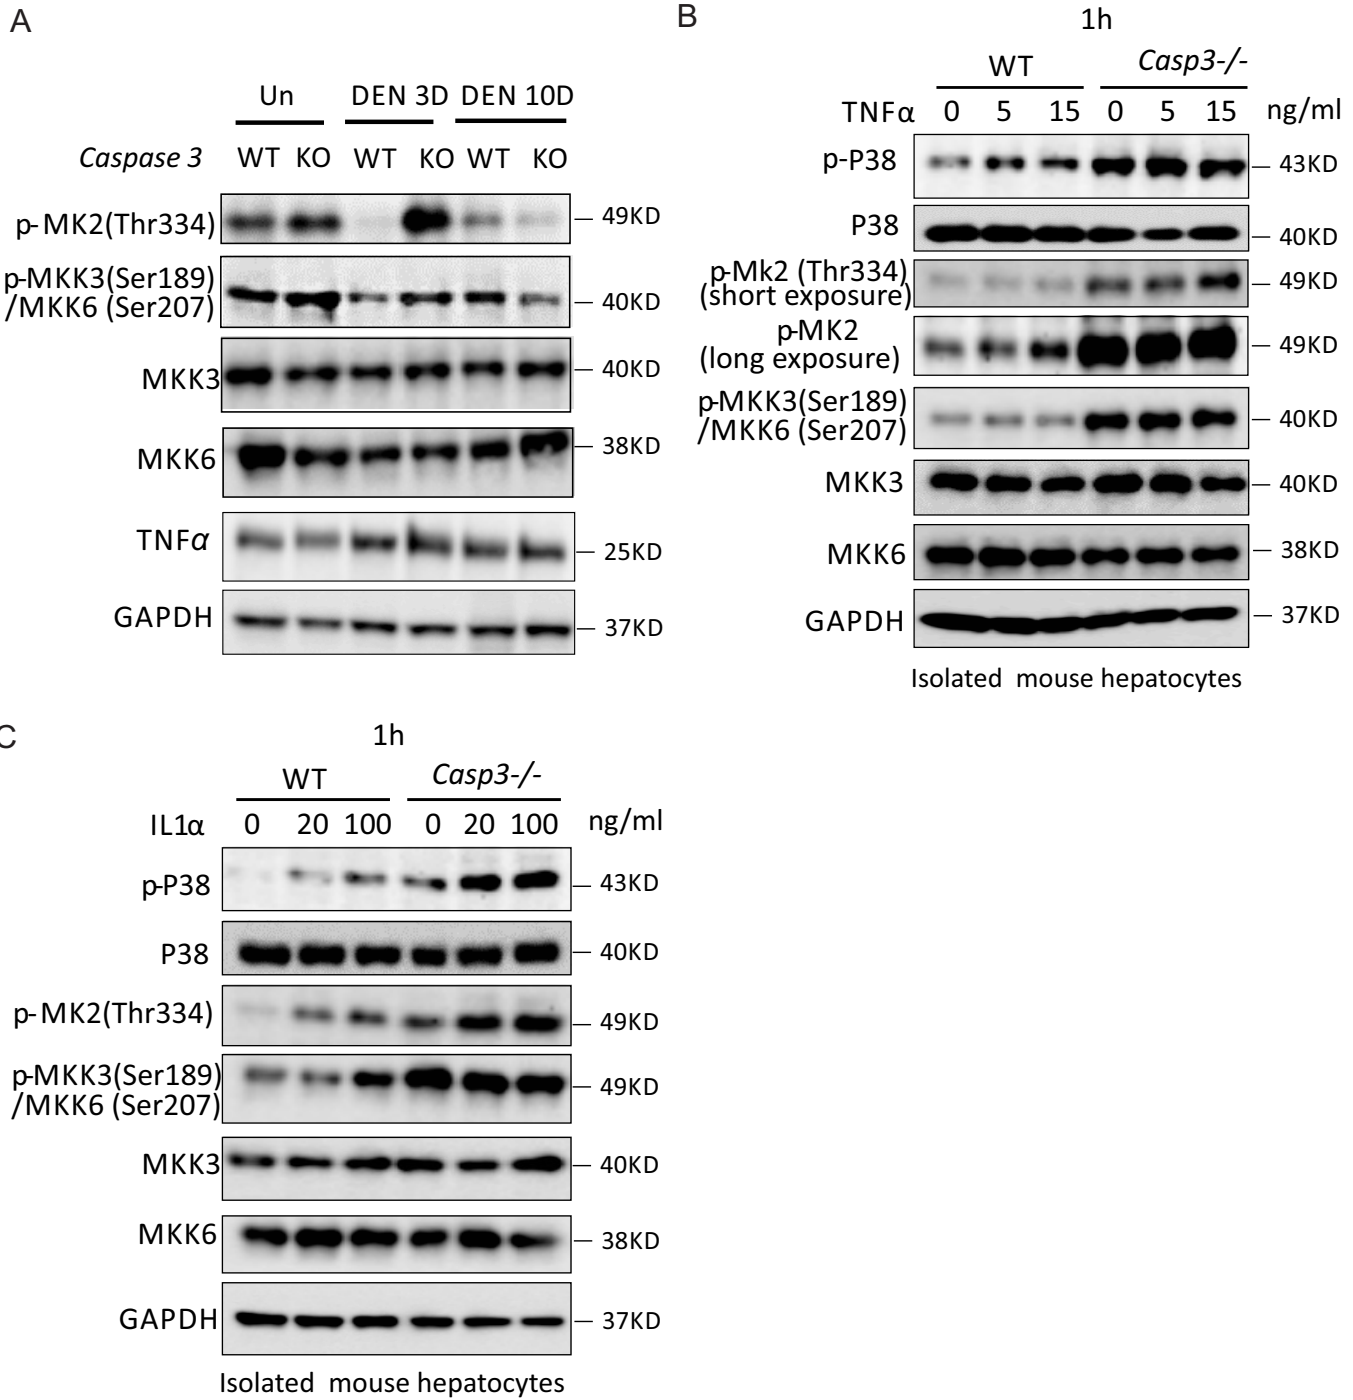

Fig. S6

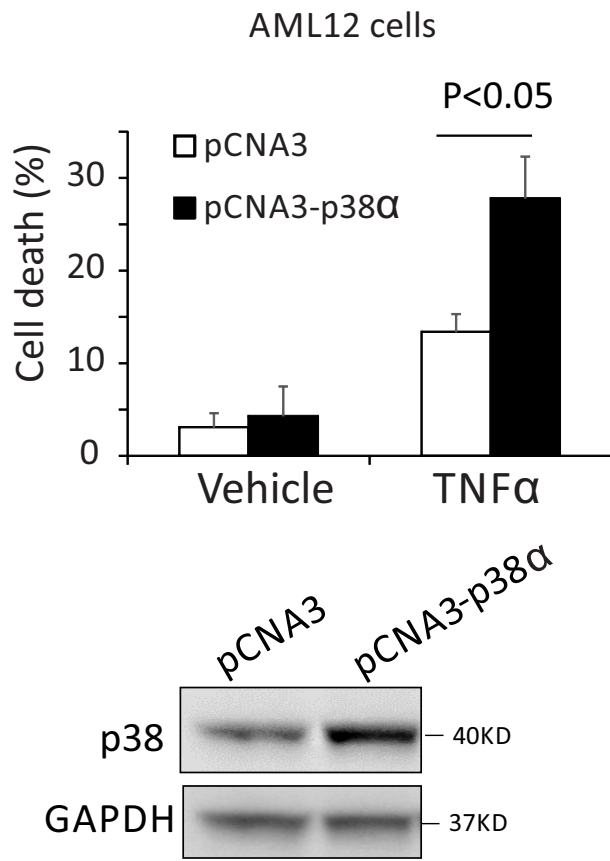

Fig. S7

A

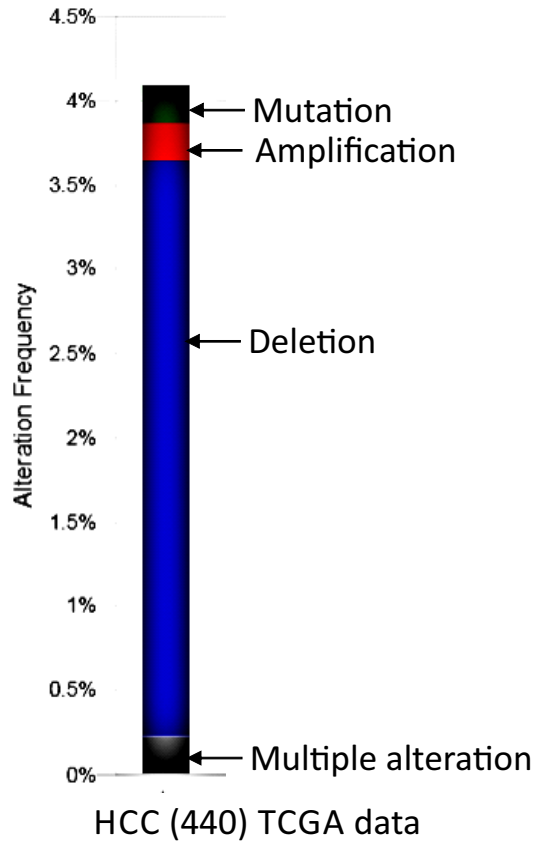

B

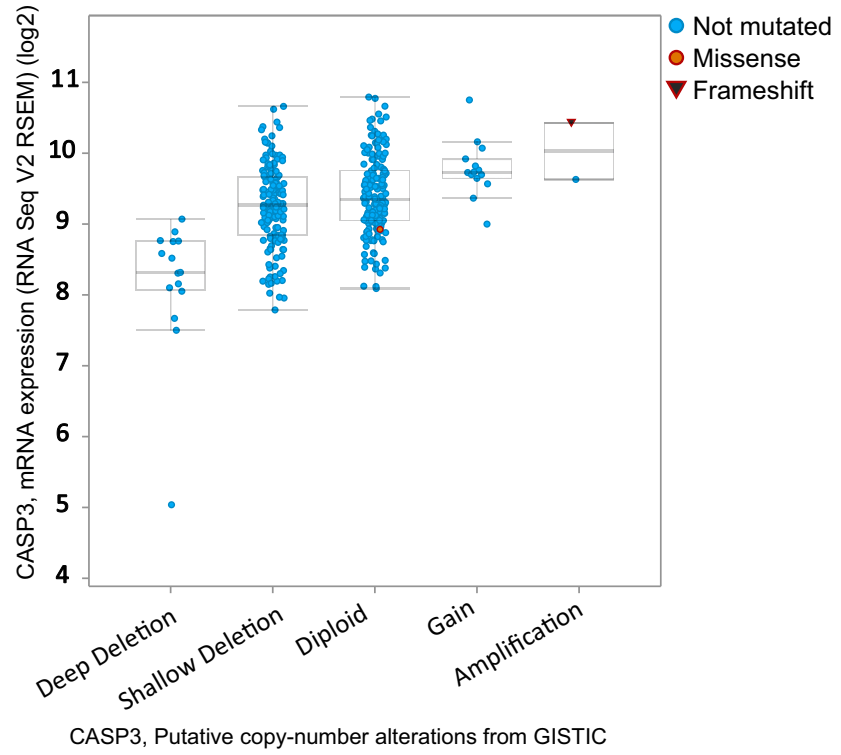

Supplement: 41419_2018_617_MOESM1_ESM.pdf [file 41419_2018_617_MOESM1_ESM.pdf]
